# Supplementary material for: Expression of area-specific M2-macrophage phenotype by recruited rat monocytes in duct-ligation pancreatitis
Source: PubMed Central journal article supplement (PMC4848343; doi:10.1007/s00418-016-1406-y), 2016-02-09
Supplement: 418_2016_1406_MOESM1_ESM.pdf [file 418_2016_1406_MOESM1_ESM.pdf]

## Supplementary Fig. 1

### interlobular area

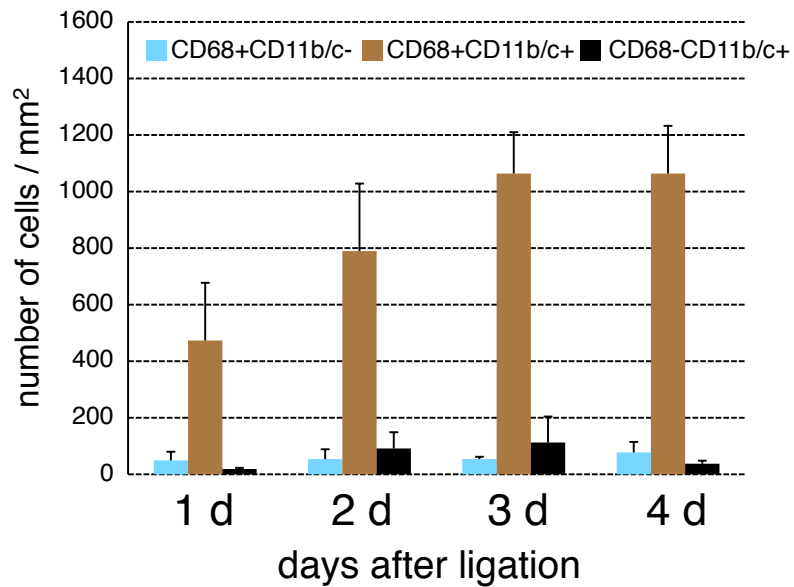

### interacinar area

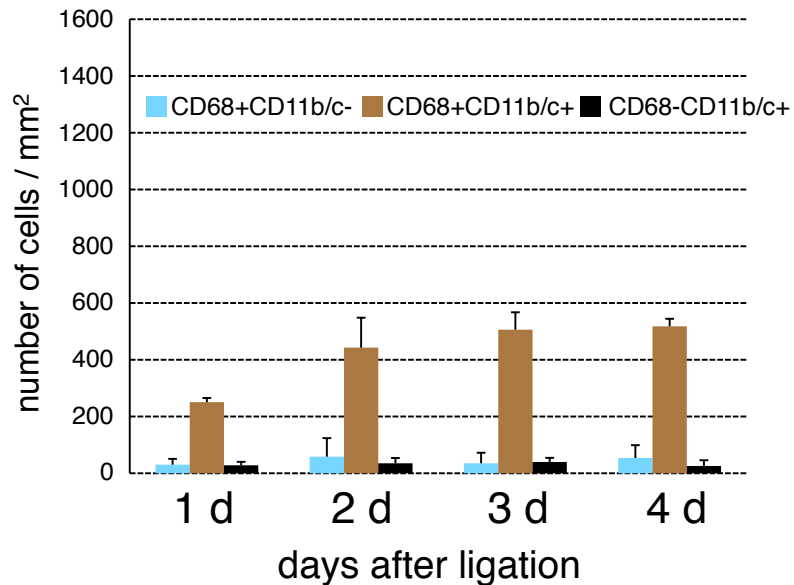

### Supplementary Fig. 1

Kinetics of macrophages with different phenotypes in the interlobular and interacinar areas of Wistar rat pancreas. Numbers of single- or double-positive cells for CD68 and CD11b/c/mm<sup>2</sup> of each area were counted (mean  $\pm$  S.D., n = 3 rats each). Note that most of CD68<sup>+</sup> cells (>90%) in both areas were positive for CD11b/c<sup>+</sup>.

## Supplementary Fig. 2

### GFP<sup>-</sup> cell phenotype

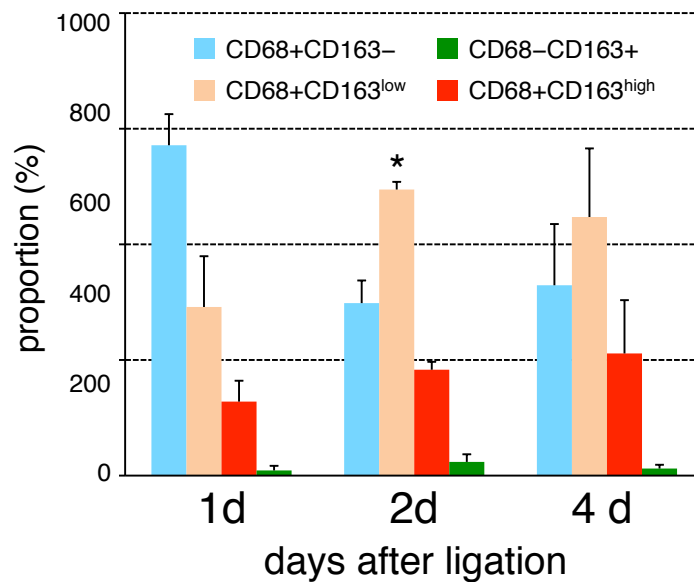

### Supplementary Fig. 2

Kinetics of macrophages with different phenotypes in the GFP<sup>+</sup> leukocyte-transfer experiment. Proportions of GFP<sup>-</sup>CD68<sup>+</sup>CD163<sup>low</sup> cells significantly increased from day 1 to day 2 ( $*p < 0.05$ ) cells, indicating kinetics similar to that of GFP<sup>+</sup> cells.
